1        **Clinical Data on Hospital Environmental Hygiene Monitoring and**  
2                **Medical Staffs Protection during the Coronavirus Disease 2019**  
3                                **Outbreak**

4  
5        **Yanfang Jiang<sup>1\*</sup>, Haifeng Wang<sup>1\*</sup>, Likun Chen<sup>2</sup>, Jiaxue He<sup>1</sup>, Ligu Chen<sup>1</sup>, Yong**  
6        **Liu<sup>1</sup>, Xinyuan Hu<sup>1</sup>, Ang Li<sup>1</sup>, Siwen Liu<sup>1</sup>, Peng Zhang<sup>1</sup>, Hongyan Zou<sup>1</sup>, Shucheng**  
7        **Hua<sup>1,3#</sup>**

8        1. Key Laboratory of Organ Regeneration & Transplantation of the Ministry of  
9        Education, Genetic Diagnosis Center, The First Hospital of Jilin University,  
10       Changchun, China

11       2. Hospital-Acquired Infection Control Department, The First Hospital of Jilin  
12       University, Changchun, China

13       3. Department of Respiratory Medicine, The First Hospital of Jilin University, Jilin  
14       University, Changchun, Jilin, China

15

16       #Corresponding Author: Shucheng Hua,

17       Department of Respiratory Medicine, The First Hospital of Jilin University, Jilin  
18       University, Changchun, Jilin, China

19       E-mail address: huashucheng2020@163.com

20       \* Yanfang Jiang and Haifeng Wang made equal contributions to this study.

21

22

23       NOTE: This preprint reports new research that has not been certified by peer review and should not be used to guide clinical practice.

24 **Abstract**

25 **Background:** The outbreak of coronavirus disease 2019 (COVID-19) and  
26 SARS-CoV-2 have placed unprecedented challenges on hospital environmental  
27 hygiene and medical staffs protection. It is crucial to assess hospital environmental  
28 hygiene to understand the most important environmental issues for controlling the  
29 spread of 2019-nCoV in hospitals.

30 **Objective:** To detect the presence of the COVID-19 in the air and on the surfaces of  
31 the guide station, fever clinic, and isolation areas, and the close contacts medical  
32 staffs in the First Hospital of Jilin University.

33 **Methods:** Viruses in the air were collected by natural sedimentation and air particle  
34 sampler methods. Predetermined environmental surfaces were sampled using swabs at  
35 seven o'clock in the morning before disinfection. The samples from close contacts  
36 medical staffs were throat swab samples. Quantitative real-time PCR methods were  
37 used to confirm the existence of COVID-19 pathogens.

38 **Results:** Viruses could be detected on the surfaces of the nurse station in the isolation  
39 area with suspected patients and in the air of the isolation ward with an intensive care  
40 patient.

41 **Conclusion:** Comprehensive monitoring of hospital environmental hygiene during  
42 pandemic outbreaks is conducive to the refinement of hospital infection control. It is  
43 of great significance to ensure the safety of medical treatment and the quality of  
44 hospital infection control through the monitoring of environmental hygiene.

45 **Key words** COVID-19; hospital environmental hygiene; hospital-associated infection,

46 medical staff protection

47

48

49

50

51

52

53

54

55

56

57

58

59

60

61

62

63

64

65

66

67

## 68 **1. Introduction**

69 The outbreak of COVID-19 in Wuhan in December 2019 has led to a serious public  
70 health event <sup>[1-3]</sup>. Meanwhile, the outbreak of this novel virus placed unprecedented  
71 challenges on hospital environmental hygiene. The occurrence of  
72 medicalstaff-associated infections is closely related to long-lived pathogens in the  
73 hospital environment <sup>[4,5]</sup>. Thus, it is crucial to assess hospital environmental hygiene  
74 to understand the most important environmental issues for controlling the spread of  
75 COVID-19 in hospitals. Furthermore, the Chinese government has quickly adopted  
76 quarantine measures for confirmed and suspected patients to restrain the spread of the  
77 pandemic<sup>[6]</sup>. However, the isolation wards in general hospitals have all been  
78 transformed into temporary wards and cannot meet the standard of isolation wards in  
79 infectious disease hospitals. Such temporary isolation wards have many concerns and  
80 require additional environmental monitoring assessments. Comprehensive monitoring  
81 of hospital environmental hygiene during the outbreak of the pandemic is conducive  
82 to the refinement of hospital infection control <sup>[5,7]</sup>. It also increases the understanding  
83 of the environmental challenges corresponding to the reemergence of COVID-19 or  
84 similar viruses. Therefore, it is of great significance to ensure the safety of medical  
85 treatment and the quality of hospital infection control through the monitoring of  
86 environmental hygiene. According to a report from the China Centers for Disease  
87 Control and Prevention, as of February 11, 3019 medical staffs were infected with the  
88 new coronavirus (including confirmed cases, suspected cases, clinically diagnosed  
89 cases, and asymptomatic infections, of which 1,716 were confirmed cases and 0.3%

90 died), indicated that the infection from non-occupational exposure may existed <sup>[8]</sup> but  
91 more evidence are needed to support this hypothesis. Meanwhile, it is of great  
92 significance to ensure the safety of medical treatments and the quality of hospital  
93 infection control through monitoring the hospital environmental hygiene. However, a  
94 sensitive and effective method to monitor the hospital-acquired infection control is  
95 still limited. Here, by monitoring COVID-19 and detecting the nucleic acid, we reveal  
96 the clinical data of hospital environmental hygiene and provide a way to monitor  
97 pathogenic microorganism contamination and nosocomial infections.

## 98 **2. Methods**

### 99 **2.1 Participant characteristics**

100 15 suspected patients and 1 confirmed intensive care patients (ORF1b and N were  
101 positive by Q-PCR) are hospitalized in two isolation areas at the First Hospital of Jilin  
102 University, a unit of COVID-19 detection. The hospital carries out district  
103 management for these two types of patients, and each area owns nursing station. We  
104 detected 158 samples of COVID-19 from the air and surface of the hospital guide  
105 stations, fever clinic, and isolation ward areas on 2F and B1(the clean area, the  
106 semi-contaminated area, the two nurse stations and 16 isolation wards in  
107 contaminated area). The 15 suspected patients are hospitalized in isolation area 1  
108 (ward 1-15) on the 2nd floor and the confirmed intensive care patient is hospitalized  
109 in isolation area 2 (ward 16) on the B1 floor. (Table 1) We also detected 18 throat  
110 swab samples from “close contacts” medical staffs. This study was approved by the  
111 Ethics Committee of the First Hospital of Jilin University (Changchun, China).

112 **Table 1: 158 viral samples from the air and surfaces of the hospital nurse station,**  
113 **fever clinic, and isolation areas**

| Risk level       | Classification         | Samples collected points           |                                                                       |
|------------------|------------------------|------------------------------------|-----------------------------------------------------------------------|
| High-risk area   | CONTAMINATED AREA      | Isolation ward area 1 (2F)         | Isolation ward 1-15 door handle                                       |
|                  |                        |                                    | Isolation ward 1-15 general subject surface                           |
|                  |                        |                                    | Isolation ward 1-15 indoor air                                        |
|                  |                        |                                    | Isolation ward 1-15 window frames                                     |
|                  |                        |                                    | Isolation ward 1-15 sides of the toilet handle                        |
|                  |                        |                                    | Nurse station general subject surface                                 |
|                  |                        |                                    | Nurse station indoor air                                              |
|                  |                        |                                    | Corridor exit general subject surface                                 |
|                  |                        |                                    | General subject surface of the refuse storage area near nurse station |
|                  |                        | Isolation ward area 2 (B1)         | Isolation ward 16 door handle                                         |
|                  |                        |                                    | Isolation ward 16 general subject surface                             |
|                  |                        |                                    | Isolation ward 16 indoor air                                          |
|                  |                        |                                    | Isolation ward 16 window frames                                       |
|                  |                        |                                    | Isolation ward 16 sides of the toilet handle                          |
|                  |                        |                                    | Nurse station indoor air                                              |
|                  |                        | Fever clinic 2 consulting rooms    | Door handle (inside and outside)                                      |
|                  |                        |                                    | General subject surface                                               |
|                  |                        |                                    | Indoor air                                                            |
|                  |                        |                                    | Computer keyboard                                                     |
|                  |                        | Fever clinic observing room        | Door handle (inside and outside)                                      |
|                  |                        |                                    | General subject surface                                               |
|                  |                        |                                    | Indoor air                                                            |
|                  |                        |                                    | Computer keyboard                                                     |
|                  |                        | Fever clinic laboratory            | Door handle (inside and outside)                                      |
|                  |                        |                                    | General subject surface                                               |
|                  |                        |                                    | Indoor air                                                            |
|                  |                        |                                    | Computer keyboard                                                     |
|                  |                        | Fever clinic blood collection room | General subject surface                                               |
| Indoor air       |                        |                                    |                                                                       |
| Medium-risk area | SEMI-CONTAMINATED AREA | Isolation ward area buffer room    | Doorhandle                                                            |
|                  |                        |                                    | General subject surface                                               |
|                  |                        |                                    | Indoor air                                                            |
|                  |                        |                                    | Doctor office window frames                                           |
|                  |                        |                                    | Refuse storage area wall surface                                      |
|                  |                        |                                    | Disinfection bucket surface                                           |
|                  |                        |                                    | Dressing room ground                                                  |

|               |            |                                  |                                                            |
|---------------|------------|----------------------------------|------------------------------------------------------------|
|               |            |                                  | Medical staffs of infection department protective clothing |
|               |            | Guide stations                   | General subject surface                                    |
|               |            |                                  | Infrared thermometer                                       |
| Low-risk area | CLEAN AREA | Isolation ward area working area | Entrance corridor general subject surface                  |
|               |            |                                  | Indoor air                                                 |
|               |            |                                  | Entrance corridor window frames                            |
|               |            |                                  | Physician's office doorhandle                              |
|               |            |                                  | Physician's office general subject surface                 |
|               |            |                                  | Director's office doorhandle                               |
|               |            |                                  | Doorhandle                                                 |

114

## 115 2.2 Sampling and sample processing

116 The environmental monitoring methods were referred to the Hygienic Standard for  
 117 Disinfection in Hospitals (GB15982-2012). All air samples were collected by two  
 118 methods: natural sedimentation<sup>[9]</sup> and the microbial air sampler called MAS-100 ECO,  
 119 of which stream of air has been set to exactly 100 liters / minute (Merck, Germany)  
 120 <sup>[10]</sup>. Environmental surfaces were sampled using swabs. The samples from "close  
 121 contacts" medical staffs were throat swab samples.

## 122 2.3 Primer and probe sequences

123 Two sequence regions (ORF1b and N) that are highly conserved among  
 124 sarbecoviruses were selected for primer and probe designs. The primer and probe  
 125 sequences for the ORF1b gene assay were 5'-TGGGGYTTTACRGGTAACCT-3'  
 126 (forward; Y = C/T, R = A/G), 5'-AACRCGCTTAACAAAGCACTC-3' (reverse; R =  
 127 A/G) and 5'-TAGTTGTGATGCWATCATGACTAG-3' (probe, in  
 128 5'-FAM/ZEN/3'-IBFQ format; W = A/T), whereas the primer and probe sequences for  
 129 the N gene assay were 5'-TAATCAGACAAGGAACTGATTA-3' (forward),

130 5'-CGAAGGTGTGACTTCCATG-3' (reverse) and

131 5'-GCAAATTGTGCAATTTGCGG-3' (probe, in 5'-FAM / ZEN/3'-IBFQ format).

132 The expected amplicon sizes of the ORF1b and N gene assays were 132 bp and 110

133 bp, respectively <sup>[11]</sup>. All primers and probes were purchased from a commercial source

134 (Integrated DNA Technologies). The primer and probe sequences were subsequently

135 confirmed to have perfect matches with other COVID-19 genome sequences available

136 from the Global Initiative on Sharing All Influenza Data (GISAID;

137 <https://www.gisaid.org/>; accession numbers: EPI\_ISL\_402119, EPI\_ISL\_402120,

138 EPI\_ISL\_402121, EPI\_ISL\_402123 and EPI\_ISL\_402124; accessed 12 January

139 2020).

#### 140 **2.4 RNA extraction**

141 For RNA extraction from 600 µL of 0.9% NaCl solution in a 2.0 mL tube, the samples

142 were centrifuged at 12000g for 10 min and incubated for 30 min, the supernatant was

143 discarded, 50 µL of RNA release agent was added into the tube, and the sample was

144 mixed and incubated for 10 min.

#### 145 **2.5 Real-Time reverse transcription PCR**

146 A 50 µL reaction contained 20 µL of RNA and 30 µL of 1× reaction buffer consisting

147 of 26 µL of COVID-19-PCR Mix (containing primers (4.62%), probes (1.15%),

148 dNTPs (3.85%), MgCl<sub>2</sub> (0.77%), Rnasin (0.48%), and PCR buffer (89.13%)

149 (Shengxiang, Hunan, China) , 4 µL of COVID-19-PCR-Enzyme Mix (containing RT

150 Enzyme (62.5%) and Taq Enzyme (37.5%) (Shengxiang, Hunan, China)). Thermal

151 cycling was performed at 50 °C for 30 min for reverse transcription, followed by



152 95 °C for 1 min and then 45 cycles of 95 °C for 15 s and 60 °C for 30 s. Participating  
153 laboratories used a Hongshi SLAN 96 S (Hongshi, Shanghai, China). A sample was  
154 considered positive when the qPCR Ct value was  $\leq 40$ .

### 155 3. Results

156 A total of 158 air and surface samples were collected from the hospital guide station,  
157 fever clinics and isolation ward areas, which were most likely contaminated by  
158 confirmed and suspected COVID-19-infected patients. The two positive areas were  
159 the surfaces of the nurse station in the isolation area with suspected patients and the  
160 air of the isolation ward with an intensive care patient (Table 2 and Table 3). We  
161 found that the virus was present both on surfaces and in the air. The total positive rate  
162 was 1.26% (2/158). The positive rate of the air and surface samples was 3.57% (1/28)  
163 and 0.77% (1/130), respectively. The results of 18 throat swab samples from “close  
164 contacts” medical staffs were negative.

165

166 **Table 2: Air monitoring results of different risk areas**

167

| Type             |                                    | Negative | Positive | Positive rate |
|------------------|------------------------------------|----------|----------|---------------|
| High-risk area   | Isolation ward                     | 19       | 1        | 5%            |
|                  | Fever clinic Consulting rooms      | 2        |          |               |
|                  | Fever clinic Observing room        | 1        |          |               |
|                  | Fever clinic Laboratory            | 1        |          |               |
|                  | Fever clinic Blood collection room | 1        |          |               |
| Middle-risk area | Isolation ward Nurse station       | 1        | 0        | 0             |
|                  | Isolation ward Buffer room         | 1        | 0        | 0             |
| Low-risk area    | Isolation ward Clean area          | 1        | 0        | 0             |
| Total            |                                    | 27       | 1        | 3.57%         |

168

169

170  
171  
172

**Table 3: Surface monitoring results of different risk areas**

| Type             |                                                           | Negative   | Positive | Positive rate |
|------------------|-----------------------------------------------------------|------------|----------|---------------|
| High-risk area   | Isolation ward Door handle, general surface               | 51         | 0        | 0%            |
|                  | Isolation ward Toilet handle                              | 6          | 0        | 0             |
|                  | Fever clinic Consulting rooms                             | 3          | 0        | 0             |
|                  | Fever clinic Observing room                               | 3          | 0        | 0             |
|                  | Fever clinic Laboratory                                   | 6          | 0        | 0             |
|                  | Fever clinic Blood collection room                        | 16         | 0        | 0             |
|                  | Medical staff of infection department Protective clothing | 1          | 0        | 0             |
| Middle-risk area | Guide stations                                            | 11         | 0        | 0             |
|                  | Isolation ward Nurse station (keyboard)                   | 5          | 1        | 16.67%        |
|                  | Isolation ward Buffer room                                | 3          | 0        | 0             |
| Low-risk area    | Isolation ward Clean area                                 | 12         | 0        | 0             |
|                  | Clean area Keyboards                                      | 9          | 0        |               |
| <b>Total</b>     |                                                           | <b>129</b> | <b>1</b> | <b>0.77%</b>  |

173  
174  
175  
176  
177  
178  
179

Based on the original 24 hours of ultraviolet air filtering, 1000-2000 mg/L chlorine-containing disinfectant for ambient air and floor disinfection, the frequency and duration time of air disinfections were extended. Key surfaces such as computer keyboards that were easily overlooked were emphatically noted and carefully disinfected the samples from the positive area and indoor air were collected 24 hours later, and the test results were negative.

180  
181  
182  
183  
184  
185

#### **4. Discussion**

The isolation wards in general hospitals have all been transformed into temporary wards and cannot meet the standard of isolation wards in infectious disease hospitals. Such temporary isolation wards have many concerns and require further environmental monitoring assessments. The hermetic spaces of isolation ward is weak of air flow, may cause the high construct of virus. Our positive results of nuclear acid

186 tests indicated that viruses are present in the air of an isolation ward with intensive  
187 care patients. Additionally, the confirmed patient underwent tracheal intubation the  
188 day before samples were collected, and this procedure produces large amounts of  
189 aerosols that spread in the wards and seriously pollutes the air. The traditional  
190 methods to sterilize the environment are performed with 75% alcohol, ultraviolet  
191 disinfection and chlorinated disinfectant, show a limit effect. These data indicated that  
192 conventional chlorine disinfection and 24-hour ultraviolet disinfection filtration  
193 cannot clear the virus from the air and hospital workers under the inadequate  
194 protection may carry a risk of infection in the isolation ward during care activities  
195 with intensive care patients. Therefore, it is necessary to increase the intensity of  
196 disinfection for isolation wards with intensive care patients. Siegel et al. reported that  
197 medical ventilators might generate respiratory aerosols that have been associated with  
198 an increased risk of occupationally acquired infection among healthcare personnel <sup>[12]</sup>.  
199 Thus, an additional and effective disinfection is very necessary for hospital infection  
200 control and medical staffs' protection. We should enhance ventilator exhaust  
201 management, for example, by adding ventilator exhaust port filters.  
202 The suspected and confirmed patients stay a relatively long time in the high risk area  
203 may influence the environment. The intrusive and other operations which are easily  
204 produce aerosols may cause serious air pollution. The under observation sites without  
205 patient and operation have less impact on the environment. The samples from same  
206 collected point were test after taken a series of infection prevention and control  
207 measures, such as using of air disinfection machine for the ward air disinfection

208 continuously, extending the frequency of disinfection for ground and object surfaces,  
209 changing the gloves and clean hands after operation and leaving the ward, covered  
210 computer keyboard and change the cover each day. The results are negative, showed  
211 the effectiveness of disinfection. The high-risk areas such hospital guide stations and  
212 fever clinic, due to the open environment and large air flow, the results were negative.  
213 At present, the cleaning work in most hospitals is provided by socialized services,  
214 which are ability to perform routine cleaning and disinfection. A more professional  
215 and targeted disinfection which is offered by infection control department and hospital  
216 system but not the by socialized services, is very necessary when the highly infectious  
217 diseases or pathogenic microorganisms appear. The routine cleaning and disinfection  
218 is most likely cause the deficiency of disinfection of the hospital environment, leading  
219 to the spread of pathogens<sup>[13]</sup>. In our study, viruses were detected on the surfaces of  
220 nurse station in isolation area with suspected patients, suggested that we need to  
221 strengthen the surface disinfection of nurse stations, especially focusing on computer  
222 keyboards, mice and equipment that are not easy to disinfect. A large number of  
223 studies have shown that the hands or gloves of medical staffs may be contaminated by  
224 contact with environmental surfaces contaminated by pathogens<sup>[13-15]</sup>. In the process  
225 of diagnosis and treatment, pathogens may be transmitted to patients and cause  
226 hospital-associated infections. Therefore, it is also very important to further  
227 strengthen the hand hygiene of medical staffs.  
228 There are still deficiencies in hospital environmental hygiene. We need to formulate  
229 refinement measures based on environmental hygiene monitoring data to improve the

230 quality of hospital infection control. Due to the “uncultivable” microbe widely exist,  
231 traditional method to measure the effect of hospital infection control such as  
232 sedimentation (exposuring the plate in the enviorment) showed limit and insensive  
233 effect. For the labortary and testging organization, .high contraction of nucleas acid  
234 may exists in aerosol, may infulence the test result and operater’s safety, even cause  
235 the spreading. The nucleic acid detect provide an effective method to monitor the  
236 environment and evaluate the effectiveness of disinfection, especially for the highly  
237 contagious diseases or pathogenic microorganisms with a potential aerosol risk like  
238 COVID-19. These nucleic acid detect results are very important for the standardized  
239 hospital infection control. This study also increases the understanding of the  
240 environmental challenges corresponding to reemergence of 2019-nCoV or similar  
241 viruses.

242 The data obtained in this study suggest that 2019-nCoV enters the air of the isolation  
243 ward with intensive care patients and deposits on the surfaces of nurse stations and  
244 that medical staffs encounter this virus in the air and on surfaces during patient care  
245 activities. The effective disinfection may reduce the risk of bio-safety.

246 For hospital infection control, we suggest:

- 247 1. Different people are responsible for the isolation observation area and the  
248 isolation ward area respectively, area crossing is strictly prohibited.
- 249 2. Objects in each district should be used exclusively; for those cannot be used for  
250 special purposes should be sterilized before being used in other areas.
- 251 3. Strickly observing hand hygiene rules thoroughly and in time.

252 4. An additional gloves, disposable isolator, protective screen or hood should be  
253 weared when the opertaion may cause the spattering of blood, body fluid and  
254 aerosol, which should be discarding in time to avoid the pollution of other area.

255

## 256 **Acknowledgment**

257 This work was supported by the National Natural Science Foundation of China (Nos.  
258 30972610 and 81273240), Jilin Province Science and Technology Agency (Nos.  
259 20160101037JC, 20170622009JC, 2017C021, and 2017J039), Norman Bethune  
260 Program of Jilin University (2012206), and Open Project Funding from State Key  
261 Laboratory of Kidney Diseases. We thank the patients and their families for  
262 participating in this study. We would also like to acknowledge the professional  
263 manuscript services of American Journal Experts

264

## 265 **Disclosure Statement**

266 The authors have no conflicts of interest to declare.

267

268

269

270

271

272

273

## 274 5. References

- 275 1. Benvenuto, D., et al., The global spread of 2019-nCoV: a molecular  
276 evolutionary analysis. *Pathog Glob Health*. 2020, 12: 1-4.
- 277 2. Huang, C., et al., Clinical features of patients infected with 2019 novel  
278 coronavirus in Wuhan, China. *Lancet*. 2020, 395(10223): 497-506.
- 279 3. The, L., Emerging understandings of 2019-nCoV. *Lancet*. 2020, 395(10221):  
280 311.
- 281 4. Anderson, D.J., et al., Enhanced terminal room disinfection and acquisition  
282 and infection caused by multidrug-resistant organisms and *Clostridium*  
283 *difficile* (the Benefits of Enhanced Terminal Room Disinfection study): a  
284 cluster-randomised, multicentre, crossover study. *Lancet*. 2017, 389(10071):  
285 805-814.
- 286 5. Beggs, C., et al., Environmental contamination and hospital-acquired  
287 infection: factors that are easily overlooked. *Indoor air*. 2015, 25(5): 462-74.
- 288 6. Wang, D., et al., Clinical Characteristics of 138 Hospitalized Patients With  
289 2019 Novel Coronavirus-Infected Pneumonia in Wuhan, China. *JAMA*. 2020.
- 290 7. Phan, L.T., et al., Respiratory viruses in the patient environment. *Infect*  
291 *Control Hosp Epidemiol*. 2020, 41(3):259-266.
- 292 8. Chinese Center for Disease Control and Prevention, Beijing 102206, China.  
293 Epidemiology group of new coronavirus pneumonia emergency response  
294 mechanism, Chinese center for disease control and prevention, The  
295 epidemiological characteristics of an outbreak of 2019 novel coronavirus

- 296 diseases (COVID-19) in China, *Zhonghua Liu Xing Bing Xue Za Zhi*. 2020,  
297 41(2):145-151.
- 298 9. Odebode A, et al., Airborne fungi spores distribution in various locations in  
299 Lagos, Nigeria. *Environ Monit Assess*. 2020, 192(2):87.
- 300 10. Irie K, et al., Investigation of the detection ability of an intrinsic  
301 fluorescence-based bioaerosol detection system for heat-stressed bacteria. *PDA*  
302 *J Pharm Sci Technol*. 2014, 68(5):478-93.
- 303 11. Chu DKW, et al., Molecular Diagnosis of a Novel Coronavirus (2019-nCoV)  
304 Causing an Outbreak of Pneumonia. *Clin Chem*. 2020, pii: hvaa029. doi:  
305 10.1093/clinchem/hvaa029.
- 306 12. Siegel, J.D., et al., 2007 Guideline for Isolation Precautions: Preventing  
307 Transmission of Infectious Agents in Health Care Settings. *Am J Infect*  
308 *Control*. 2007, 35(10 Suppl 2): S65-164.
- 309 13. Pirincci, E. and B. Altun, An analysis of hospital cleaning staff's attitudes and  
310 conduct regarding hand hygiene and cleaning. *Int J Occup Saf Ergon*. 2016,  
311 22(2): 241-5.
- 312 14. Pittet, D., et al., Evidence-based model for hand transmission during patient  
313 care and the role of improved practices. *Lancet Infect Dis*. 2006, 6(10):  
314 641-52.
- 315 15. Christensen, T.E., J.S. Jorgensen, and H.J. Kolmos, [The importance of  
316 hygiene for hospital infections]. *Ugeskr Laeger*. 2007, 169(49): 4249-51.
